# Supplementary material for: Template protection of gold nanoclusters for the detection of organophosphorus pesticides
Source: Royal Society of Chemistry journal article supplement (doi:10.1039/c9nj01007f), 2019-01-01
Supplement: c9nj01007f1.pdf [file c9nj01007f1.pdf]

## *Supporting Information*

### **Template protection of gold nanocluster for detection of organophosphorus pesticides**

Huan Li, Hongyu Chen, MingxiaLi, Qiujun Lu, Youyu Zhang\* and Shouzhuo Yao

*Key Laboratory of Chemical Biology and Traditional Chinese Medicine Research (Ministry of Education), College  
of Chemistry and Chemical Engineering, Hunan Normal University, Changsha 410081, PR China*

---

\* Corresponding author: Tel: +86-731-88865515; fax: +86-731-88865515;

E-mail address: zhangyy@hunnu.edu.cn

## **1. Preparation of the BSA-AuNCs**

BSA-AuNCs were prepared following previous method. Briefly, 5 mL BSA solution (50 mg mL<sup>-1</sup>, 37 °C) was mixed 5 mL aqueous HAuCl<sub>4</sub> solution (10 mM, 37 °C). 2 min later, adding 1 M NaOH solution (0.5 mL). The final solution was incubated at 37 °C for 12 h then stored at 4 °C.

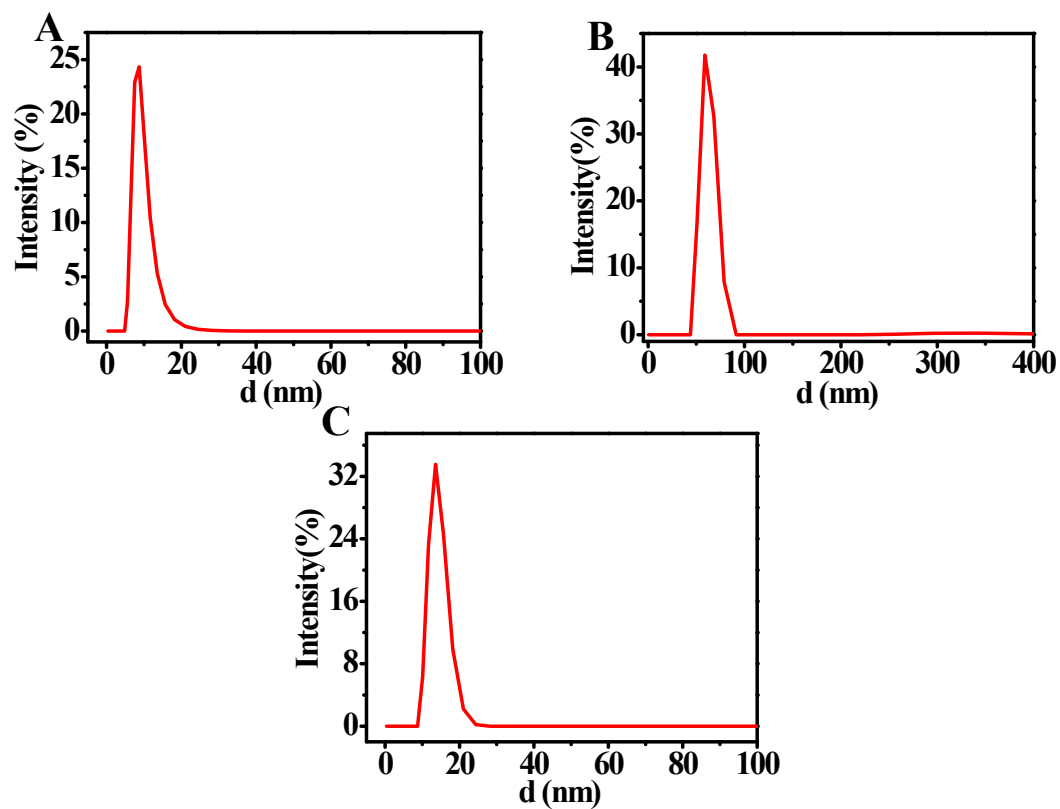

**Fig. S1.** DLS of (A) BSA-AuNCs; (B) BSA-AuNCs was incubated with  $10 \mu\text{g mL}^{-1}$  trypsin in Tris-HCl (50 mM, pH 8.5) for two hours in  $37^\circ\text{C}$  bath; (C) BSA-AuNCs/ trypsin incubated with  $5 \mu\text{g mL}^{-1}$  glyphosate.

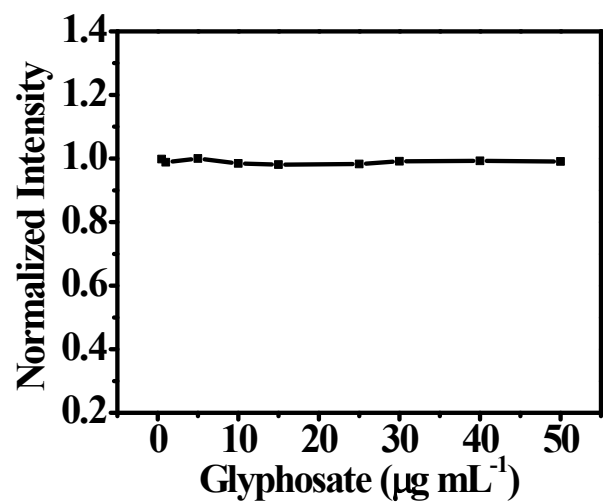

**Fig. S2.** The influence of different concentration (0.5, 1.0, 5.0, 10.0, 15.0, 25, 30, 40, and 50 µg mL<sup>-1</sup>) of glyphosate on the fluorescent intensity of BSA-Au NCs.

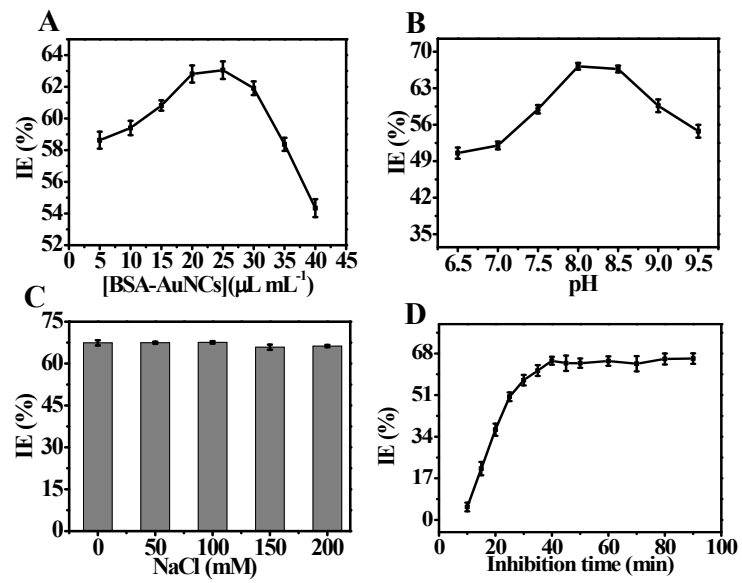

**Fig. S3.** Effect of (A) the concentration of BSA-AuNCs, (B) pH, ionic strengths (ionic strengths were controlled by various concentrations of NaCl) and (D) inhibition time and on inhibition efficiency of BSA-AuNCs/trypsin/glyphosate. The slit widths of emission and excitation were 5 nm.

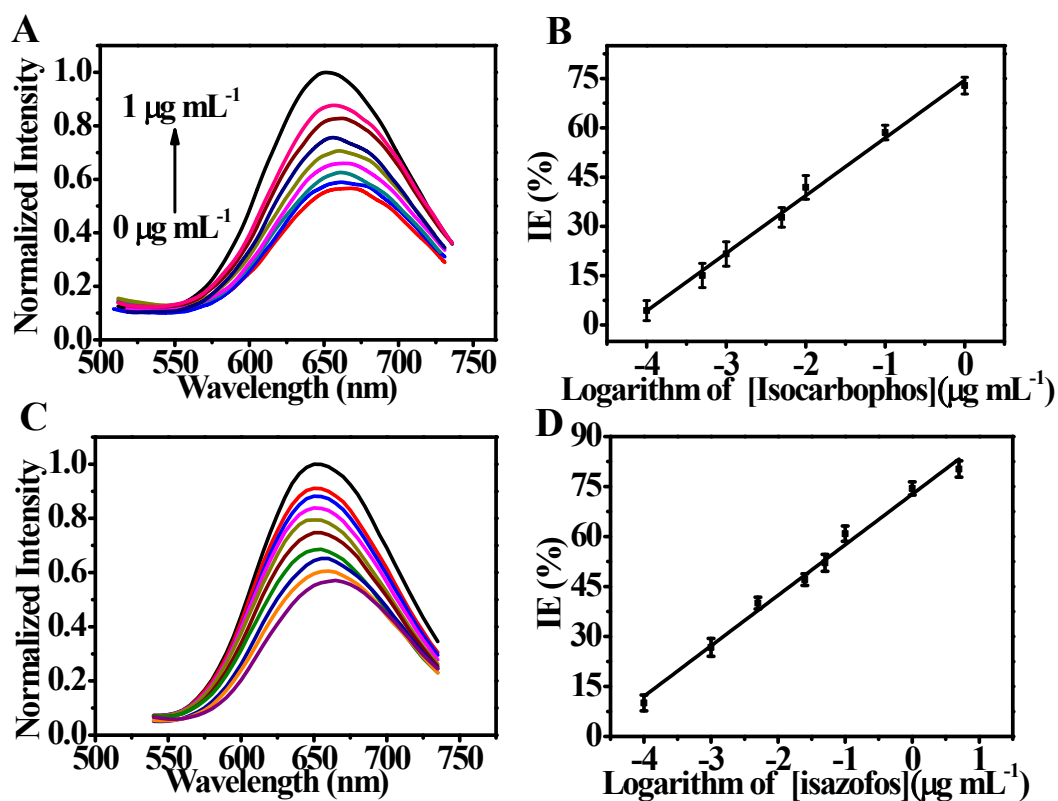

Fig. S4. (A, C) Fluorescence spectra of BSA-AuNCs/trypsin system in the presence of various concentration of isocarbophos (from bottom:  $0.1 \text{ ng mL}^{-1}$  to  $1 \text{ }\mu\text{g mL}^{-1}$ ) and isazofos (from bottom:  $0.1 \text{ ng mL}^{-1}$  to  $5 \text{ }\mu\text{g mL}^{-1}$ ). (B, D) the linear plot of the inhibition efficiency versus the logarithm concentration of isocarbophos and isazofos. The slit widths of emission and excitation were 5 nm.

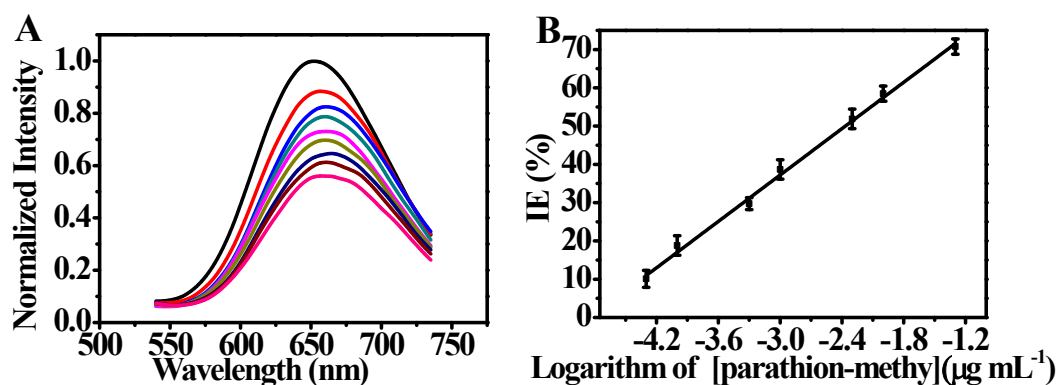

Fig. S5. (A) Fluorescence spectra of BSA-AuNCs/trypsin system in the presence of various concentration of parathion-methyl (from  $0.05 \text{ ng mL}^{-1}$  to  $50 \text{ ng mL}^{-1}$ ). (B) the linear plot of the inhibition efficiency versus the logarithm concentration of parathion-methyl. The slit widths of emission and excitation were 5 nm.

**Table S1.** Comparison of different typical techniques for the determination of organophosphorus pesticides.

| <b>analyte</b>   | <b>Method</b>                     | <b>Linear range</b>                                                                                    | <b>Detection limit</b>                                                          | <b>Ref.</b>  |
|------------------|-----------------------------------|--------------------------------------------------------------------------------------------------------|---------------------------------------------------------------------------------|--------------|
| parathion        | Fluorescence                      | —                                                                                                      | $1.3 \times 10^{-6} \mu\text{g mL}^{-1}$                                        | 1            |
| parathion        | Cyclic voltammetric               | $4.0 \times 10^{-1} - 6.0 \mu\text{g mL}^{-1}$                                                         | —                                                                               | 2            |
| parathion        | Fluorescence                      | $7.49 \times 10^{-5} - 7.49 \times 10^{-1} \mu\text{g mL}^{-1}$                                        | $6.76 \times 10^{-5} \mu\text{g mL}^{-1}$                                       | 3            |
| parathion        | Fluorescence                      | $2.0 \times 10^{-5} - 2.0 \times 10^{-2} \mu\text{g mL}^{-1}$                                          | $6.7 \times 10^{-6} \mu\text{g mL}^{-1}$                                        | 4            |
| monocrotophos    | Electrochemical                   | $10^{-11} - 10^{-6} \text{ M}$<br>( $2.2 \times 10^{-6} - 2.2 \times 10^{-1} \mu\text{g mL}^{-1}$ )    | $2.7 \times 10^{-12} \text{ M}$<br>( $6.0 \times 10^{-7} \mu\text{g mL}^{-1}$ ) | 5            |
| monocrotophos    | Electrochemical                   | 1–50 nM<br>( $2.2 \times 10^{-4} - 1.1 \times 10^{-2} \mu\text{g mL}^{-1}$ )                           | 1.0 nM<br>( $2.2 \times 10^{-4} \mu\text{g mL}^{-1}$ )                          | 6            |
| dimethoate       | Colorimetric                      | $2.5 \times 10^{-7} - 1 \times 10^{-4} \text{ M}$<br>( $5.7 \times 10^{-2} - 23 \mu\text{g mL}^{-1}$ ) | 0.3 ppm<br>( $0.3 \times 10^{-3} \mu\text{g mL}^{-1}$ )                         | 7            |
| dimethoate       | Chemiluminescent                  | —                                                                                                      | $5 \times 10^{-5} \mu\text{g mL}^{-1}$                                          | 8            |
| Paraoxon         | Fluorescence                      | $5.0 \times 10^{-5} - 5.0 \times 10^{-2} \mu\text{g mL}^{-1}$                                          | $5.0 \times 10^{-5} \mu\text{g mL}^{-1}$                                        | 9            |
| parathion-methyl | Fluorescent                       | $4 \times 10^{-5} - 4 \times 10^{-3} \mu\text{g mL}^{-1}$                                              | $1.8 \times 10^{-5} \mu\text{g mL}^{-1}$                                        | 10           |
| paraoxon         | Fluorescent                       | $2.5 \times 10^{-4} - 5.0 \times 10^{-2} \mu\text{g mL}^{-1}$                                          | $1.0 \times 10^{-4} \mu\text{g mL}^{-1}$                                        | 11           |
| methyl parathion | Fluorescent                       | $2.63 \times 10^{-5} - 2.63 \times 10^{-1} \mu\text{g mL}^{-1}$                                        | $1.263 \times 10^{-5} \mu\text{g mL}^{-1}$                                      | 12           |
| Glyphosate       | Surface-enhanced Raman scattering | 0.0001-10 ppm<br>( $0.0001 \mu\text{g mL}^{-1} - 10 \mu\text{g mL}^{-1}$ )                             | 0.1 ppb<br>( $0.0001 \mu\text{g mL}^{-1}$ )                                     | 13           |
| Glyphosate       | Fluorescent                       | $1.0 \times 10^{-4} - 5 \mu\text{g mL}^{-1}$                                                           | $3.7 \times 10^{-4} \mu\text{g mL}^{-1}$                                        | Present work |

**Table S2. Recovery ratios of parathion-methyl in real samples.**

| <b>Determination methods</b> |                             | <b>BSA-AuNCs/trypsin sensor</b> |                 |                  | <b>Chromatography</b>       |                 |                  |
|------------------------------|-----------------------------|---------------------------------|-----------------|------------------|-----------------------------|-----------------|------------------|
| <b>Samples</b>               | <b>Added</b>                | <b>Measured</b>                 | <b>Recovery</b> | <b>RSD</b>       | <b>Measured</b>             | <b>Recovery</b> | <b>RSD</b>       |
|                              | <b>(ng mL<sup>-1</sup>)</b> | <b>(ng mL<sup>-1</sup>)</b>     | <b>(%)</b>      | <b>(n = 3 %)</b> | <b>(ng mL<sup>-1</sup>)</b> | <b>(%)</b>      | <b>(n = 3 %)</b> |
| <b>Pakchoi</b>               | 5                           | 4.94                            | 98.8            | 4.26             | 5.21                        | 104             | 2.92             |
|                              | 50                          | 51.6                            | 103             | 1.28             | 48.8                        | 97.6            | 1.62             |
| <b>Tomato</b>                | 5                           | 4.82                            | 96.4            | 2.92             | 4.86                        | 97.2            | 2.79             |
|                              | 50                          | 48.5                            | 97.0            | 3.98             | 49.1                        | 98.2            | 2.17             |
| <b>Wheat Flour</b>           | 5                           | 5.41                            | 108             | 2.81             | 5.30                        | 106             | 2.62             |
|                              | 50                          | 49.8                            | 99.6            | 1.92             | 49.8                        | 99.6            | 3.42             |



## References

- 1 Z. Zheng, Y. Zhou, X. Li, S. Liu and Z. Tang, *Biosens. Bioelectron.*, 2011, **26**, 3081-3085.
- 2 Y. Zhao, Y. Ma, H. Li and L. Wang, *Anal. Chem.*, 2011, **84**, 386-395.
- 3 Y. Yi, G. Zhu, C. Liu, Y. Huang, Y. Zhang, H. Li, J. Zhao and S. Yao, *Anal. Chem.*, 2013, **85**, 11464-11470.
- 4 Q. Long, H. Li, Y. Zhang and S. Yao, *Biosens. Bioelectron.*, 2015, **68**, 168-174.
- 5 Y. Liu and M. Wei, *Food Control*, 2014, **36**, 49-54.
- 6 N. Chauhan and C. S. Pundir, *Anal. Chim. Acta*, 2011, **701**, 66-74.
- 7 N. Ben Oujji, I. Bakas, G. Istamboulié, I. Ait-Ichou, E. Ait-Addi, R. Rouillon and T. Noguier, *Food Control*, 2014, **46**, 75-80.
- 8 M. Catalá-Icardo, J. L. López-Paz, C. Choves-Barón and A. Peña-Bádena, *Anal. Chim. Acta*, 2012, **710**, 81-87.
- 9 X. Wu, Y. Song, X. Yan, C. Zhu, Y. Ma, D. Du and Y. Lin, *Biosens. Bioelectron.*, 2017, **94**, 292-297.
- 10 X. Yan, H. Li, X. Han and X. Su, *Biosens. Bioelectron.*, 2015, **74**, 277-283.
- 11 X. Yan, H. Li, T. Hu and X. Su, *Biosens. Bioelectron.*, 2016, **91**, 232-237.
- 12 J. Hou, J. Dong, H. Zhu, X. Teng, S. Ai and M. Mang, *Biosens. Bioelectron.*, 2015, **68**, 20-26.
- 13 M. J. Tan, Z. Y. Hong, M. H. Chang, C. C. Liu, H. F. Cheng, X. J. Loh, C. H. Chen, C. D. Liao and K. V. Kong, *Biosens. Bioelectron.*, 2017, **96**, 167-172.
